# Supplementary material for: Impact of sp2 carbon material species on Pt nanoparticle-based electrocatalysts produced by one-pot pyrolysis methods with ionic liquids
Source: Royal Society of Chemistry journal article supplement (doi:10.1039/d2ra01330d), 2022-01-01
Supplement: d2ra01330d1.pdf [file d2ra01330d1.pdf]

Electronic Supplementary Information

**Impact of  $sp^2$  carbon material species on Pt nanoparticle-based  
electrocatalysts produced by one-pot pyrolysis methods with ionic liquids**

Yu Yao,<sup>ab</sup> Qingning Xiao,<sup>a</sup> Masafumi Kawaguchi,<sup>a</sup> Tetsuya Tsuda,<sup>\*ac</sup> Hirohisa Yamada<sup>b</sup>  
and Susumu Kuwabata<sup>\*ad</sup>

<sup>a</sup> *Department of Applied Chemistry, Graduate School of Engineering,  
Osaka University, 2-1 Yamada-oka, Suita, Osaka 565-0871, Japan*

<sup>b</sup> *Department of Chemical Engineering, National Institute of Technology,  
Nara College, 22 Yata-cho, Yamatokoriyama, Nara 639-1080, Japan*

<sup>c</sup> *Department of Materials Science, Graduate School of Science and Engineering,  
Chiba University, 1-33 Yayoicho, Inage-ku, Chiba 263-8522, Japan*

<sup>d</sup> *Innovative Catalysis Science Division,  
Institute for Open and Transdisciplinary Research Initiatives,  
Osaka University, 2-1 Yamada-oka, Suita, Osaka 565-0871, Japan*

\*Corresponding authors: Tetsuya Tsuda and Susumu Kuwabata

E-mail addresses: [ttsuda@chiba-u.jp](mailto:ttsuda@chiba-u.jp) and [kuwabata@chem.eng.osaka-u.ac.jp](mailto:kuwabata@chem.eng.osaka-u.ac.jp)

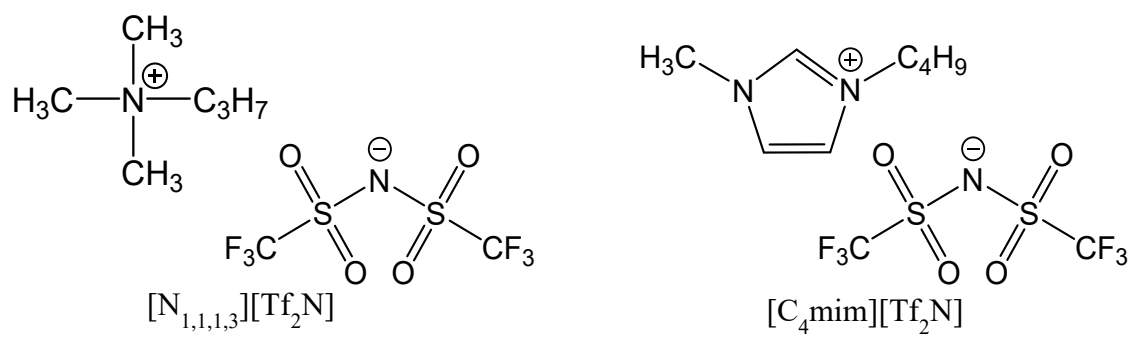

**Fig. S1** Chemical structural formulae of ionic liquids used in this study.

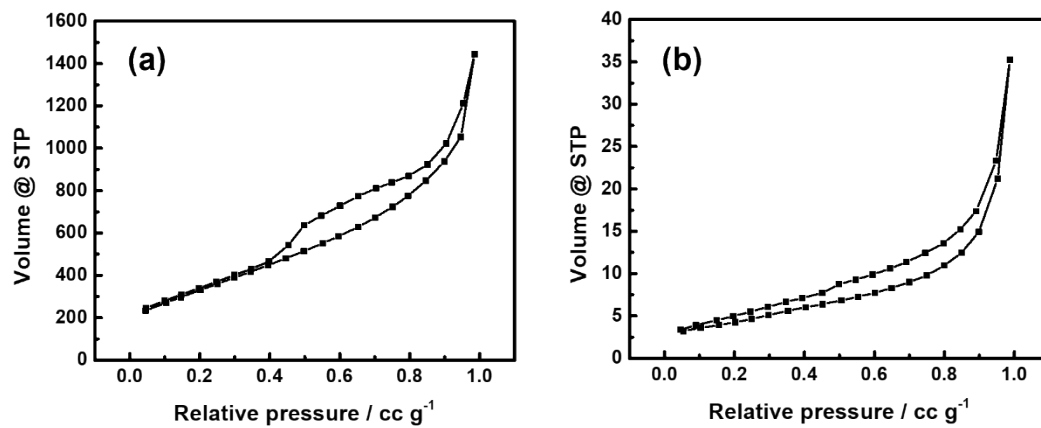

**Fig. S2** Nitrogen adsorption-desorption isotherms of (a) GNPs-3 and (b) MWCNTs. The BET specific surface areas of GNPs-3 and MWCNTs were estimated to be 1243 and 210 m<sup>2</sup> g<sup>-1</sup>, respectively.

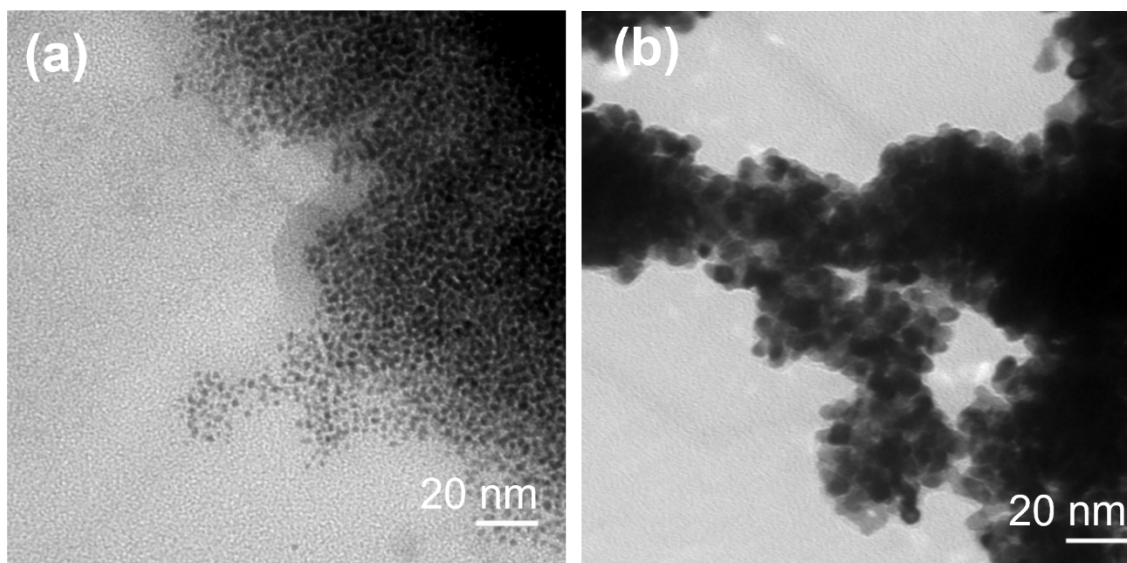

**Fig. S3** Transmission electron microscopy (TEM) images of Pt nanoparticles prepared under the same experimental conditions as given in Table 1, but without  $\text{sp}^2$  carbon materials. The ILs employed were (a)  $[\text{C}_4\text{mim}][\text{Tf}_2\text{N}]$  and (b)  $[\text{N}_{1,1,1,3}][\text{Tf}_2\text{N}]$ .

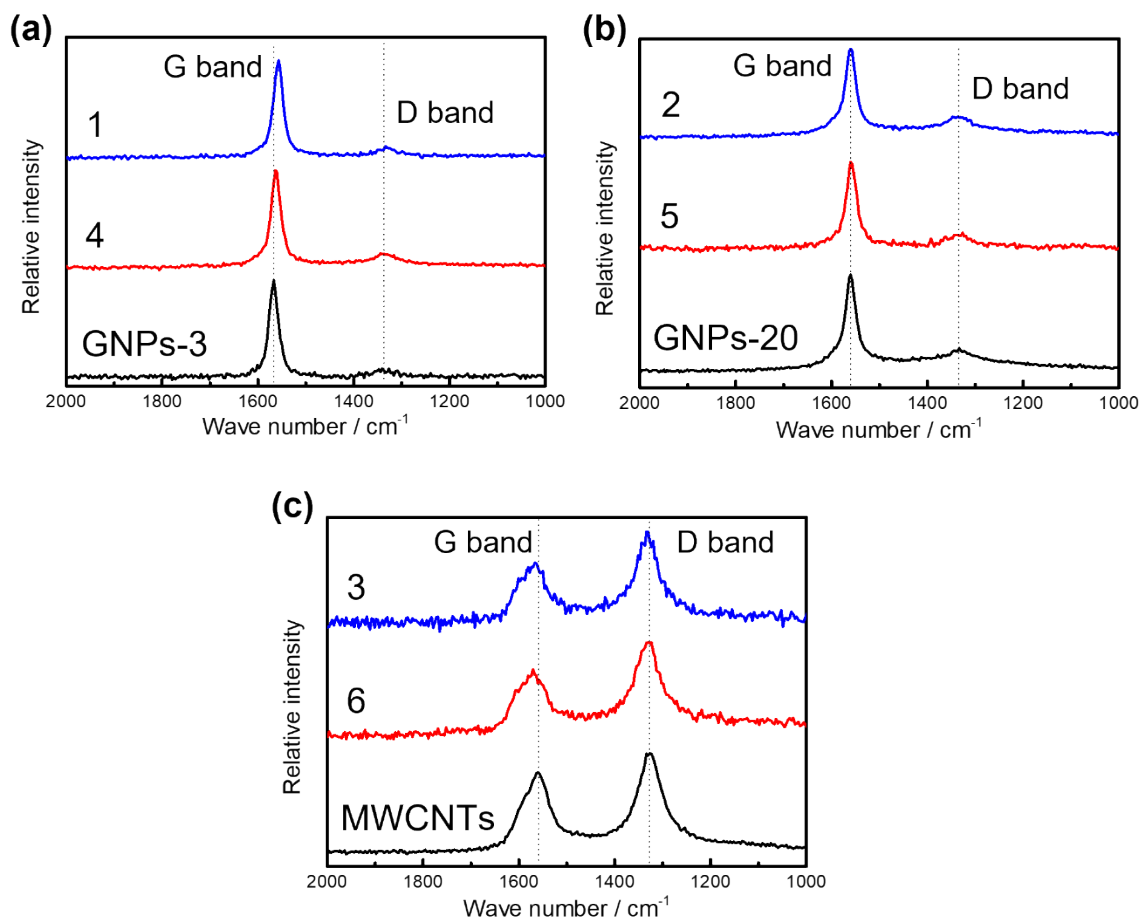

**Fig. S4** Raman spectra of specimens 1–6. The  $\text{sp}^2$  materials used in the IL one-pot pyrolysis method were (a) GNPs-3, (b) GNPs-20, and (c) MWCNTs. The ILs employed for this process were (blue)  $[\text{C}_4\text{mim}][\text{Tf}_2\text{N}]$  and (red)  $[\text{N}_{1,1,1,3}][\text{Tf}_2\text{N}]$ . (black) Original  $\text{sp}^2$  carbon material.

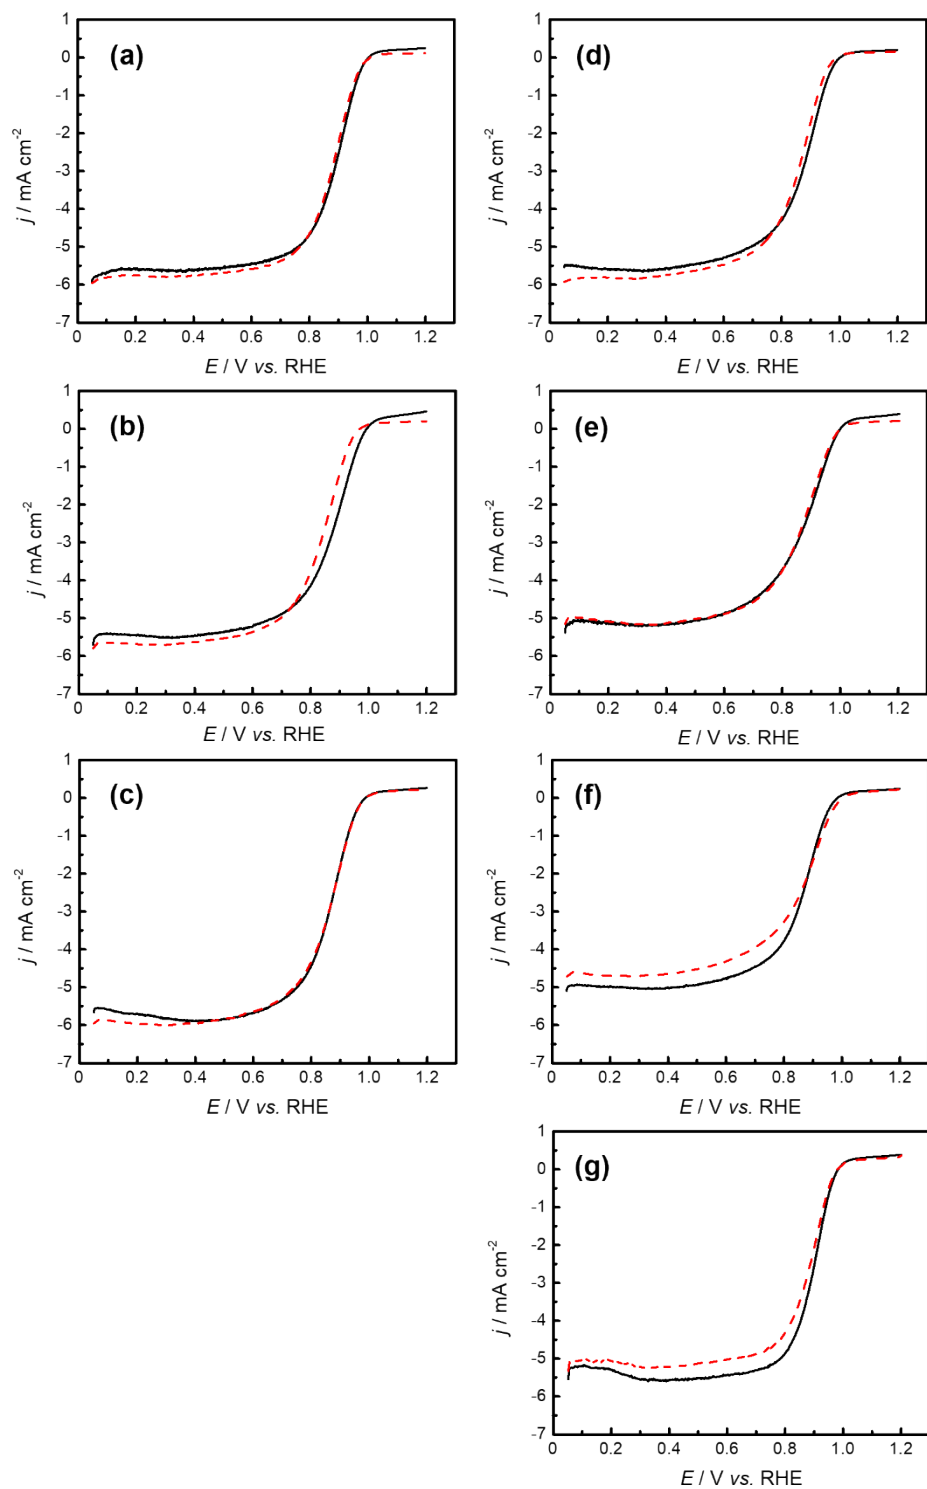

**Fig. S5** Linear sweep voltammograms recorded at glassy carbon stationary electrodes with specimens (a) **1**, (b) **2**, (c) **3**, (d) **4**, (e) **5**, (f) **6**, and (g) **Pt-C** in an  $\text{O}_2$ -saturated 0.1 M  $\text{HClO}_4$  aqueous solution (—) before and (---) after the durability test. The rotating speeds were 1600 rpm. The scan rate was  $10 \text{ mV s}^{-1}$ .

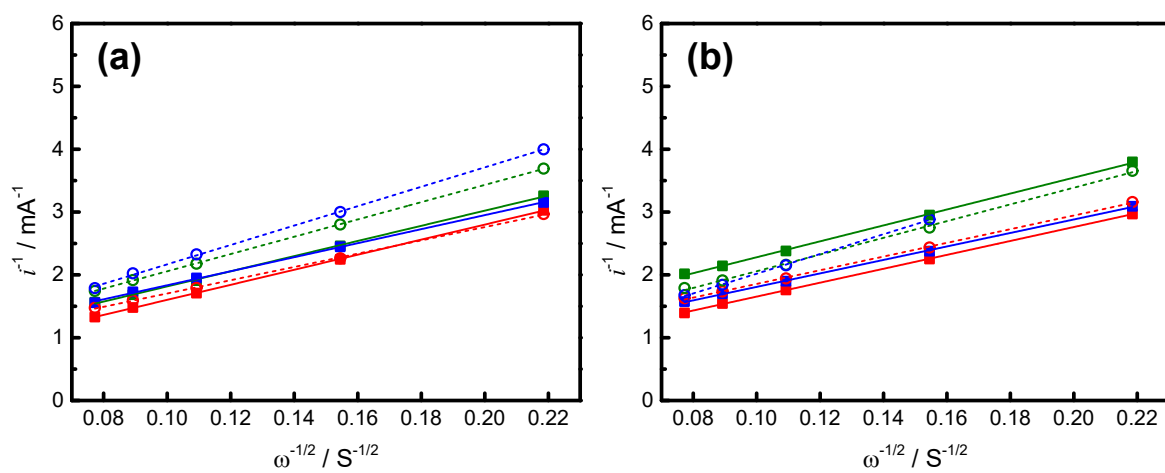

**Fig. S6** Koutecký-Levich plots (a) before and (b) after durability tests. The potential for constructing the plots was 0.85 V. (c) Variation in surface retention rate estimated from the Koutecký-Levich plots as a function of cycle number. The specimens are (■) 1, (■) 2, (■) 3, (○) 4, (○) 5, and (○) 6.
